# Supplementary material for: Association Between Repeated Exposure to Hurricanes and Mental Health in a Representative Sample of Florida Residents
Source: PubMed Central journal article supplement (PMC9204543; doi:10.1001/jamanetworkopen.2022.17251), 2022-06-16
Supplement: jamanetwopen-e2217251-s001.pdf [file jamanetwopen-e2217251-s001.pdf]

## Supplementary Online Content

Garfin DR, Thompson RR, Holman EA, Wong-Parodi G, Silver RC. Association between repeated exposure to hurricanes and mental health in a representative sample of Florida residents. *JAMA Netw Open*. 2022;5(6):e2217251. doi:10.1001/jamanetworkopen.2022.17251

**eTable 1.** Demographic Characteristics of the Sample Compared with Population Benchmarks

**eTable 2.** Descriptive Statistics for Posthurricane Posttraumatic Stress, Generalized Worries, Global Distress, and Functional Impairment

**eFigure 1.** Map of Survey Respondents Across Florida (Shifted Latitude and Longitude)

**eFigure 2.** Direct and Indirect Associations Between Prestorm Factors, Storm Exposures, Posthurricane Ongoing Worries, and Functional Impairment

**eFigure 3.** Direct and Indirect Associations Between Prestorm Factors, Storm Exposures, Posthurricane Global Distress, and Functional Impairment

This supplementary material has been provided by the authors to give readers additional information about their work.

eTable 1. *Demographic Characteristics of the Sample Compared with Population Benchmarks*

| Demographic Variables                  | KnowledgePanel<br>Florida Sample<br>(N=1,637) |               | Adult FL Population<br>American Community Survey<br>2015<br>(N=15,752,541) |
|----------------------------------------|-----------------------------------------------|---------------|----------------------------------------------------------------------------|
|                                        | Weighted <i>n</i>                             | Weighted<br>% | %                                                                          |
| Gender by Age                          |                                               |               |                                                                            |
| Male 18-29                             | 84                                            | 5.15          | 9.40                                                                       |
| Female 18-29                           | 145                                           | 8.88          | 9.28                                                                       |
| Male 30-44                             | 187                                           | 11.42         | 11.25                                                                      |
| Female 30-44                           | 205                                           | 12.55         | 11.83                                                                      |
| Male 45-59                             | 215                                           | 13.11         | 12.32                                                                      |
| Female 45-59                           | 230                                           | 14.07         | 13.28                                                                      |
| Male 60 +                              | 258                                           | 15.74         | 14.79                                                                      |
| Female 60 +                            | 313                                           | 19.09         | 17.86                                                                      |
| Race/Ethnicity <sup>a</sup>            |                                               |               |                                                                            |
| White, non-Hispanic                    | 1,007                                         | 61.53         | 58.40                                                                      |
| Black (African American), non-Hispanic | 201                                           | 12.30         | 13.93                                                                      |
| Other, non-Hispanic                    | 55                                            | 3.34          | 3.14                                                                       |
| Hispanic                               | 352                                           | 21.50         | 23.29                                                                      |
| 2 + races, non-Hispanic                | 22                                            | 1.33          | 1.23                                                                       |
| Metro                                  |                                               |               |                                                                            |
| Metro                                  | 1582                                          | 96.66         | 96.21                                                                      |
| Nonmetro                               | 55                                            | 3.34          | 3.79                                                                       |
| Level of Education                     |                                               |               |                                                                            |
| Less than/high school graduate         | 619                                           | 37.83         | 41.42                                                                      |
| Some college                           | 547                                           | 33.43         | 31.65                                                                      |
| Bachelor's degree or above             | 471                                           | 28.74         | 26.93                                                                      |
| Income                                 |                                               |               |                                                                            |
| Under \$25,000                         | 295                                           | 18.01         | 17.89                                                                      |
| \$25,000-\$49,999                      | 418                                           | 25.54         | 24.65                                                                      |
| \$50,000-\$74,999                      | 340                                           | 20.78         | 20.08                                                                      |
| \$75,000-\$99,999                      | 226                                           | 13.78         | 13.28                                                                      |
| \$100,000-\$149,999                    | 232                                           | 14.20         | 13.61                                                                      |
| \$150,000 and over                     | 126                                           | 7.70          | 10.48                                                                      |

<sup>a</sup>“Other” includes those who identify as American Indian or Alaska Native, Asian, Native Hawaiian or other Pacific Islander, or “a different race.”

eTable 2. *Descriptive Statistics for Post-Hurricane Posttraumatic Stress, Generalized Worries, Global Distress, and Functional Impairment, N=1,637*

| <b>Variables</b>              | <b>Wave 2 (M [SD]; Range)</b> | <b>Wave 3 (M [SD]; Range)</b> |
|-------------------------------|-------------------------------|-------------------------------|
| Posttraumatic stress symptoms | 1.48 [0.71]; 1-5              | 1.48 [0.69]; 1-4.8            |
| Generalized worries           | 2.09 [0.86]; 1-5              | 2.04 [0.81]; 1-5              |
| Global distress               | 0.49 [0.66]; 0-4              | 0.47 [0.61]; 0-4              |
| Functional impairment         | --                            | 1.54 [0.80]; 1-5]             |
| Probable PTSD <sup>a</sup>    | 10.97% ( <i>n</i> =166)       | 10.92% ( <i>n</i> =121)       |

*Note:* Posttraumatic stress symptoms measured using the Primary Care PTSD Screen for the DSM-5.<sup>32</sup> Generalized worries was measured using 8 items assessing past-week worries about the possibility of a) a terrorist attack, b) a natural disaster, c) violence (shootings, stabbings, or physical assault), and d) financial stress or strain.<sup>38</sup> Global distress was measured using a modified 9-item version of the Brief Symptom Inventory-18.<sup>36</sup> Functional impairment was measured using 4 items from the SF-36.<sup>38</sup>

<sup>a</sup>Since not all participants met Criterion A for trauma exposure, they are not assumed to have PTSD as indicated by the Diagnostic and Statistical Manual of Mental Disorders, 5<sup>th</sup> edition.

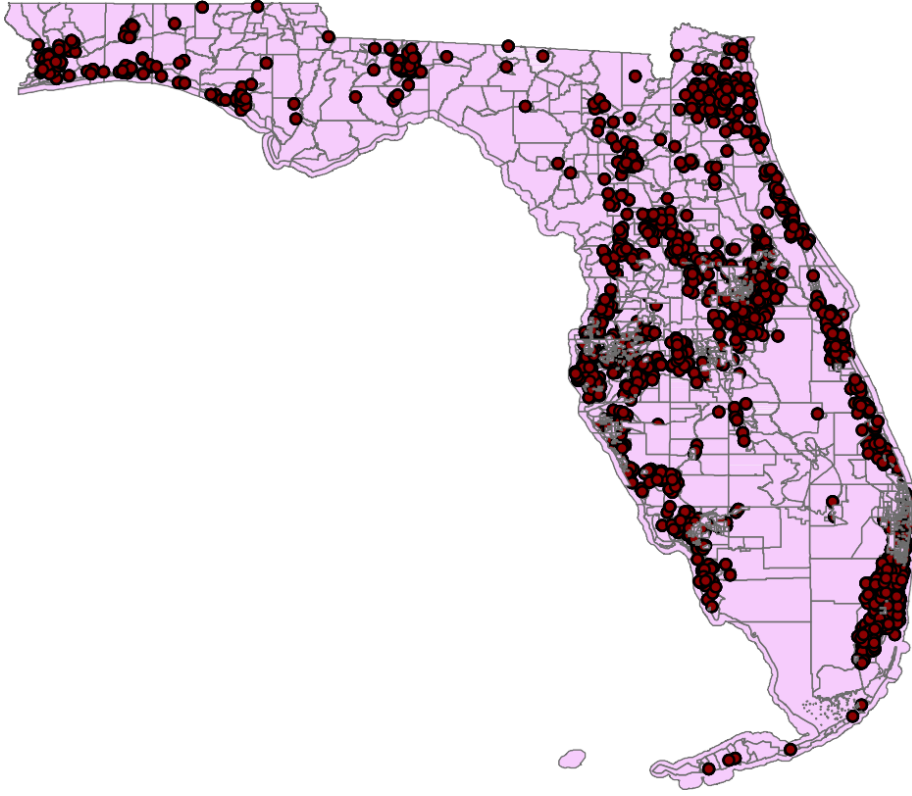

eFigure 1. Map of Survey Respondents Across Florida (Shifted Latitude and Longitude)

eFigure 2. Direct and Indirect Associations Between Prestorm Factors, Storm Exposures, Posthurricane Generalized Worries, and Functional Impairment

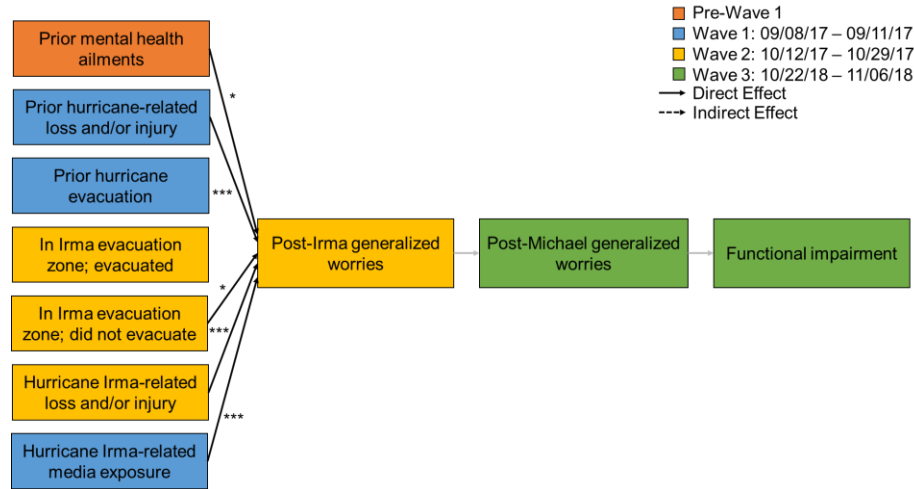

eFigure 2a. Predictors of wave 2 generalized worries

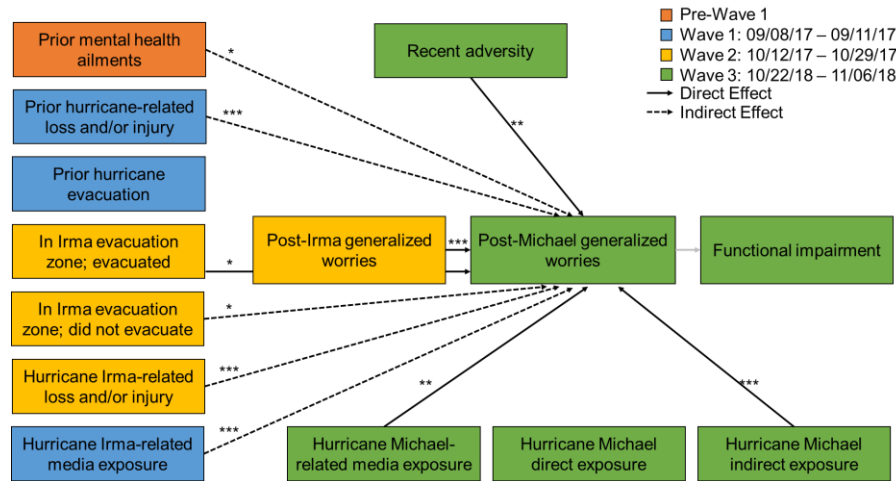

eFigure 2b. Predictors of wave 3 generalized worries

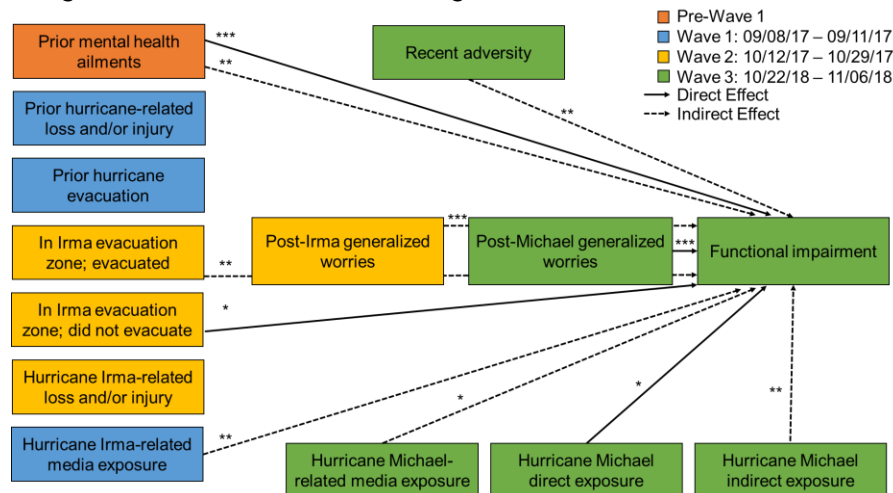

eFigure 2c. Predictors of wave 3 functional impairment

Note: \*  $p < .05$ ; \*\*  $p < .01$ ; \*\*\*  $p < .001$

eFigure 3. Direct and Indirect Associations Between Prestorm Factors, Storm Exposures, Posthurricane Global Distress, and Functional Impairment

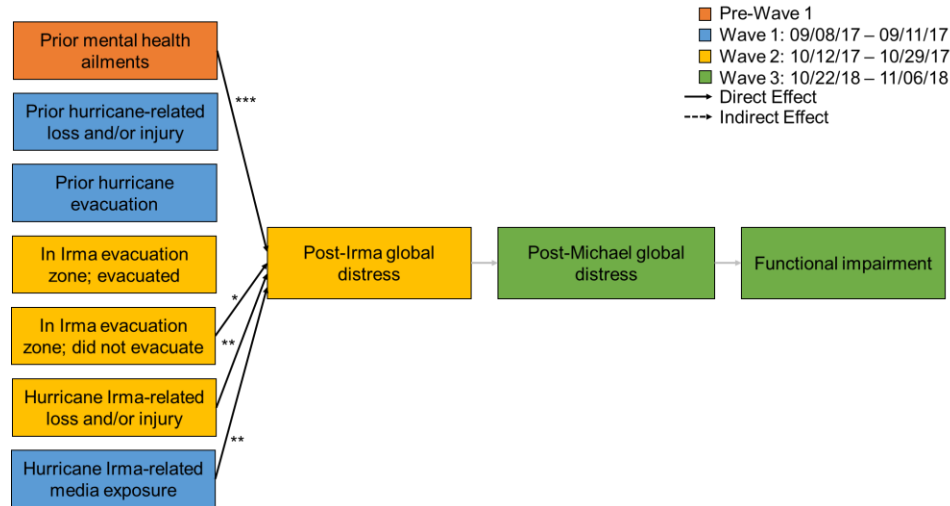

eFigure 3a. Predictors of wave 2 global distress

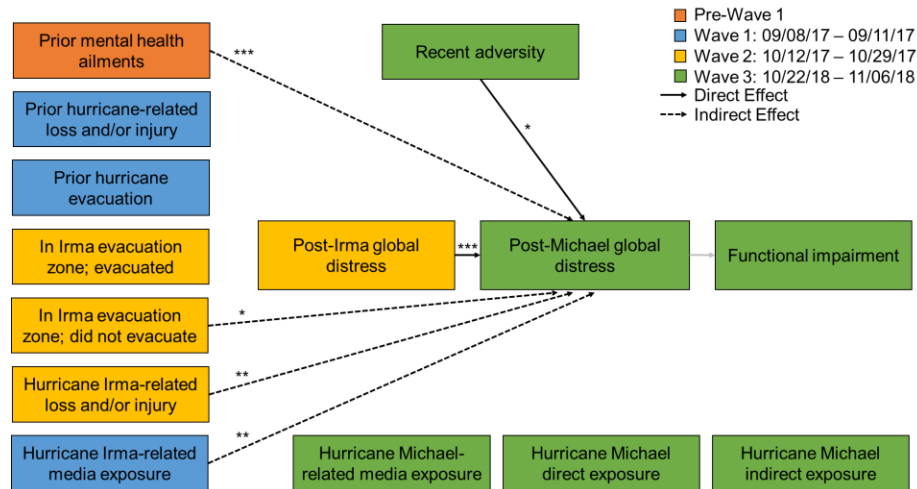

eFigure 3b. Predictors of wave 3 global distress

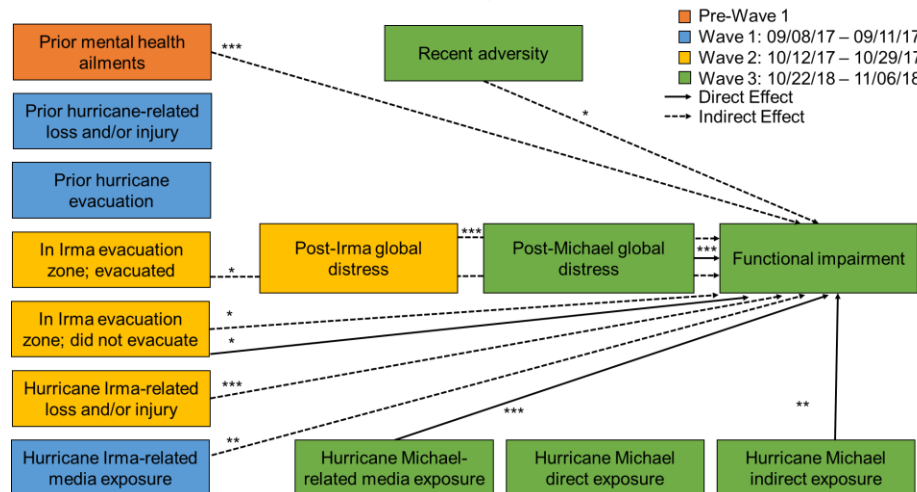

eFigure 3c. Predictors of wave 3 functional impairment

Note: \*  $p < .05$ ; \*\*  $p < .01$ ; \*\*\*  $p < .001$
